# Supplementary material for: Enzymatic Synthesis of Isotopically Labeled Hydrogen Peroxide for Mass Spectrometry-Based Applications
Source: PubMed Central journal article supplement (PMC11622373; doi:10.1021/jasms.4c00326), 2024-10-04
Supplement: js4c00326_si_001.pdf [file js4c00326_si_001.pdf]

**Supporting Information for:**

**Enzymatic synthesis of isotopically labeled  
hydrogen peroxide for mass spectrometry-based  
applications**

Margaret Hoare<sup>1</sup>, Ruiyue Tan<sup>1</sup>, Isabella Militi<sup>1</sup>, Kevin A. Welle<sup>2</sup>, Kyle Swovick<sup>2</sup>, Jennifer R. Hryhorenko<sup>2</sup>, Sina Ghaemmaghamsi<sup>1,2\*</sup>

<sup>1</sup>Department of Biology, University of Rochester, Rochester, NY, 14627, USA

<sup>2</sup>University of Rochester Mass Spectrometry Resource Laboratory, University of Rochester Medical Center, Rochester, NY, 14627, USA

\*Correspondence:

Sina Ghaemmaghamsi  
sina.ghaemmaghamsi@rochester.edu  
585-275-4829,  
326 Hutchison Hall  
University of Rochester  
Rochester NY 14627

## **Materials and methods**

### *Determination of the purity and concentration of H<sub>2</sub><sup>18</sup>O<sub>2</sub>*

To determine the purity of H<sub>2</sub><sup>18</sup>O<sub>2</sub>, 10 µg of a synthetic peptide (MASLIKKLAVDR) was incubated with diluted H<sub>2</sub><sup>18</sup>O<sub>2</sub> at 37 °C for 30 minutes and compared to an unoxidized control. Samples were frozen and lyophilized then desalted through homemade C18 columns and eluted in 50/50% acetonitrile (ACN)/H<sub>2</sub>O in 0.1% formic acid (FA).

Samples were analyzed by direct injection mass spectrometry as described below. Raw MS data was analyzed using XCalibur (Thermo). Relative levels of unmodified, <sup>16</sup>O- and <sup>18</sup>O-oxidized peptides were determined by analyzing the intact mass spectra as described previously.<sup>1</sup>

To determine the concentration of H<sub>2</sub><sup>18</sup>O<sub>2</sub>, 10 µg of a synthetic peptide (MASLIKKLAVDR) was incubated with differing concentrations of H<sub>2</sub><sup>16</sup>O<sub>2</sub> (Fisher Bioreagents) or a 2x or 5x dilution of the generated H<sub>2</sub><sup>18</sup>O<sub>2</sub> solution for 10 minutes at 37 °C. Oxidation was quenched with 400 mM sodium sulfite and samples were frozen and lyophilized. Samples were desalted through homemade C18 columns and eluted in 50/50% ACN/H<sub>2</sub>O in 0.1% FA and analyzed by direct injection mass spectrometry as described below. Fractional oxidation was determined by least squares fitting the <sup>16</sup>O-oxidation standard curve to a single exponential equation with the software KaleidaGraph and using the resulting fitted equation to determine the concentrations of the <sup>18</sup>O-oxidized peptides.

### *Generation of peptide mixtures with different oxidation levels*

To generate fully oxidized peptides, 25 µg (372 µM) of MASLIKKLAVDR at a concentration of 0.5 mg/ml was oxidized with 160 mM H<sub>2</sub>O<sub>2</sub> for 30 minutes at 37 °C. The sample was frozen and lyophilized to remove the hydrogen peroxide, then desalted in a homemade C18 column and eluted in 50% ACN/H<sub>2</sub>O in 0.1% trifluoroacetic acid (TFA). To generate fully unoxidized peptides, 25 µg of the peptide was incubated with 50 mM dithiothreitol (Sigma), 1.25 µM of Methionine Sulfoxide Reductase A and 12.3 µM of Methionine Sulfoxide Reductase B that were recombinantly expressed and purified from *E.coli*<sup>2,3</sup> in 50 mM Tris buffer for 45 minutes at 37 °C. Samples were lyophilized then desalted to remove enzymes and salts. After desalting, fully oxidized and fully reduced peptides were mixed to generate specific fractional oxidations. These pre-oxidized mixtures were then frozen and lyophilized before reconstitution in 1.25x diluted H<sub>2</sub><sup>18</sup>O<sub>2</sub>. The peptides were oxidized for 30 minutes at 37 °C, then frozen and lyophilized before desalting with homemade C18 columns into 50/50% ACN/H<sub>2</sub>O in 0.1% FA. The sample was diluted to 15 µg/mL before analysis by mass spectrometry.

### *Mass Spectrometry*

Peptides were diluted in 50/50% ACN/H<sub>2</sub>O in 0.1% FA to 15µg/mL. 40ul of this peptide was directly injected into a Q Exactive Plus Mass Spectrometer (Thermo Fisher) using a Dionex Ultimate 3000 HPLC (Thermo Fisher) with a flow rate of 100µL/min. The solvent was a 50/50% mixture of 0.1% FA in H<sub>2</sub>O and 0.1% FA in ACN that was injected for 3 minutes. A HESI source set in positive mode ionized the peptides at resolution of 70,000

at m/z 200 with a 240 ms maximum injection time, AGC target of 1e6, and an overall range of 300-2000 m/z. MS1 files were generated from raw files using MSConvert<sup>4</sup> and fractional oxidations were measured as previously described.<sup>1</sup> Under some conditions (e.g. oxidation ladder experiments shown in figure 3 where fractional <sup>16</sup>O oxidation was high prior to blocking with <sup>18</sup>O), a population of the peptide (up to 33% in the fully oxidized sample) was oxidized to form methionine sulfones in addition to methionine sulfoxides. In these cases, it was noted that ratios of <sup>16</sup>O/<sup>18</sup>O-oxidized relative to <sup>18</sup>O/<sup>18</sup>O-oxidized sulfone-containing peptides and ratios of <sup>16</sup>O-oxidized relative to <sup>18</sup>O-oxidized sulfoxide-containing peptides were similar in magnitude and reflected the expected initial <sup>16</sup>O oxidation levels. In such cases, fractional oxidation levels were determined by measuring the average of the two ratios normalized by their relative intensities.

## Abbreviations

ACN- acetonitrile

FA- formic acid

TFA- trifluoroacetic acid

HESI – heated electrospray ionization

AGC – automatic gain control

## References

- (1) Tan, R.; Hoare, M.; Welle, K. A.; Swovick, K.; Hryhorenko, J. R.; Ghaemmaghmi, S. Folding Stabilities of Ribosome-Bound Nascent Polypeptides Probed by Mass Spectrometry. *Proc. Natl. Acad. Sci.* **2023**, *120* (33), e2303167120. <https://doi.org/10.1073/pnas.2303167120>.
- (2) Tan, R.; Hoare, M.; Bellomio, P.; Broas, S.; Camacho, K.; Swovick, K.; Welle, K. A.; Hryhorenko, J. R.; Ghaemmaghmi, S. Formylation Facilitates the Reduction of Oxidized Initiator Methionines. *bioRxiv* February 7, 2024, p 2024.02.06.579201. <https://doi.org/10.1101/2024.02.06.579201>.
- (3) Hoare, M.; Tan, R.; Welle, K. A.; Swovick, K.; Hryhorenko, J. R.; Ghaemmaghmi, S. Methionine Alkylation as an Approach to Quantify Methionine Oxidation Using Mass Spectrometry. *J. Am. Soc. Mass Spectrom.* **2024**, *35* (3), 433–440. <https://doi.org/10.1021/jasms.3c00337>.
- (4) Chambers, M. C.; Maclean, B.; Burke, R.; Amodei, D.; Ruderman, D. L.; Neumann, S.; Gatto, L.; Fischer, B.; Pratt, B.; Egertson, J.; Hoff, K.; Kessner, D.; Tasman, N.; Shulman, N.; Frewen, B.; Baker, T. A.; Brusniak, M.-Y.; Paulse, C.; Creasy, D.; Flashner, L.; Kani, K.; Moulding, C.; Seymour, S. L.; Nuwaysir, L. M.; Lefebvre, B.; Kuhlmann, F.; Roark, J.; Rainer, P.; Detlev, S.; Hemenway, T.; Huhmer, A.; Langridge, J.; Connolly, B.; Chadick, T.; Holly, K.; Eckels, J.; Deutsch, E. W.; Moritz, R. L.; Katz, J. E.; Agus, D. B.; MacCoss, M.; Tabb, D. L.; Mallick, P. A Cross-Platform Toolkit for Mass Spectrometry and Proteomics. *Nat. Biotechnol.* **2012**, *30* (10), 918–920. <https://doi.org/10.1038/nbt.2377>.
